# Supplementary material
Source: publisher site journal article supplement (https://www.spandidos-publications.com/4883/downloadSupplementary)

Figure S1. Gating strategy used to identify CD8<sup>+</sup> tumor cells in the co-culture system.

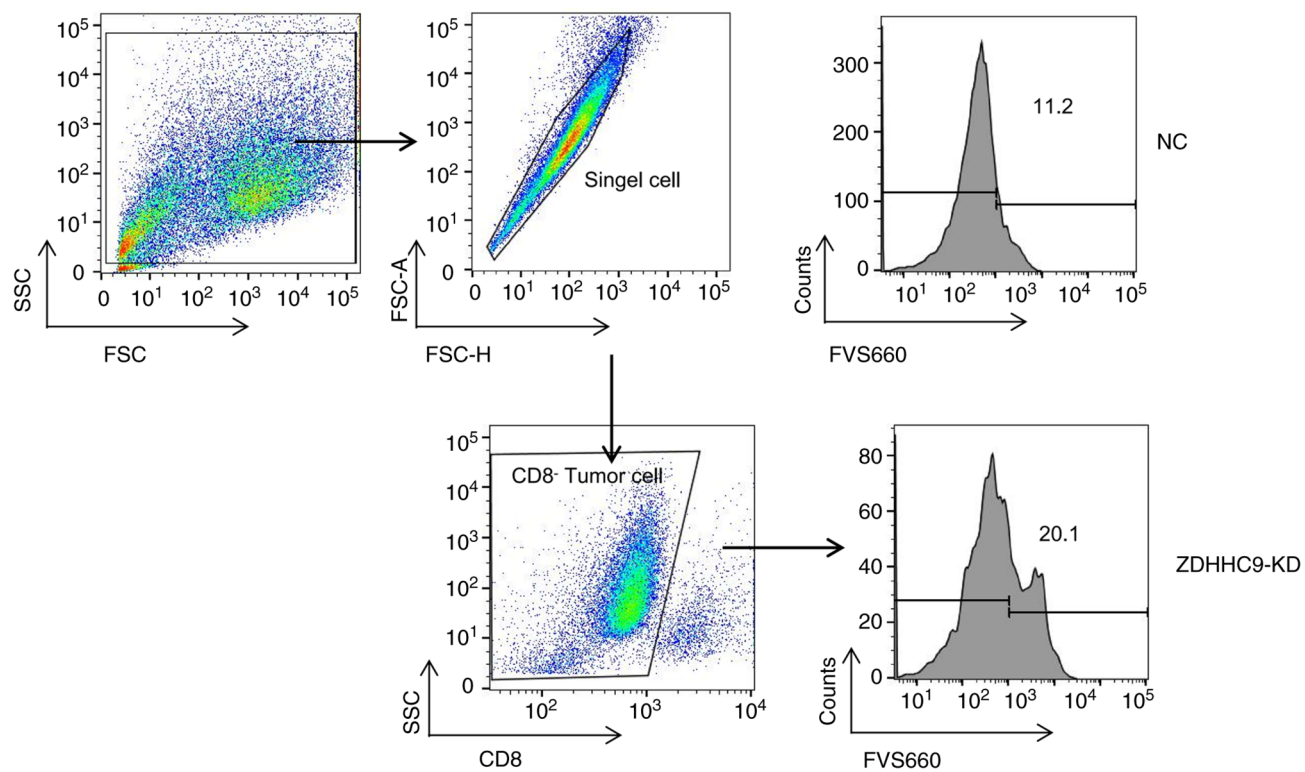

Supplement: Supplementary file 1 [file downloadSupplementary]
